# Supplementary material for: Estimates of state-level chronic hepatitis C virus infection, stratified by race and sex, United States, 2010
Source: Springer Nature journal article supplement (doi:10.1186/s12879-018-3133-6), 2018-05-16
Supplement: MOESM1 [file 15769602]

**Estimates of State-level Chronic Hepatitis C Virus Infection, Stratified by Race and Sex, United States, 2010.**

Eric W. Hall MPH<sup>1</sup>, Eli S. Rosenberg PhD<sup>2</sup>, Patrick S. Sullivan DVM PhD<sup>1</sup>

<sup>1</sup> Department of Epidemiology, Emory University Rollins School of Public Health

<sup>2</sup> Department of Epidemiology and Biostatistics, University at Albany School of Public Health

**Additional file 1**

**Table of Contents**

Table S1. Estimated Totals of the Non-Institutionalized Population from 2006-2010 5-year American Community Survey Microdata<sup>a</sup> by Sex or Race, US States and District of Columbia, 2010.....2

Table S2. Estimated Total and Prevalence Rate with HCV Antibodies by Sex, US States and District of Columbia, 2010 .....4

Table S3. Estimated Total and Prevalence Rate with Hepatitis C Antibodies among non-Hispanic White Persons, US States and District of Columbia, 2010 .....6

Table S4. Estimated Total and Prevalence Rate with Hepatitis C Antibodies among non-Hispanic Black Persons, US States and District of Columbia, 2010 .....8

Table S5. Estimated Total and Prevalence Rate with Hepatitis C Antibodies among Hispanic Persons, US States and District of Columbia, 2010.....10

References .....11

Table S1. Estimated Totals of the Non-Institutionalized Population from 2006-2010 5-year American Community Survey Microdata<sup>a</sup> by Sex or Race, US States and District of Columbia, 2010.

| State                | Sex        |            | Race/Ethnicity     |                    |            |
|----------------------|------------|------------|--------------------|--------------------|------------|
|                      | Male       | Female     | Non-Hispanic White | Non-Hispanic Black | Hispanic   |
| ALABAMA              | 1,662,073  | 1,853,907  | 2,471,932          | 850,996            | 193,052    |
| ALASKA               | 259,368    | 240,881    | 342,389            | 15,537             | 142,323    |
| ARIZONA              | 2,219,279  | 2,334,087  | 2,942,912          | 153,949            | 1,456,505  |
| ARKANSAS             | 1,017,800  | 1,103,662  | 1,661,719          | 295,347            | 164,396    |
| CALIFORNIA           | 13,154,833 | 13,762,680 | 12,278,519         | 1,534,784          | 13,104,210 |
| COLORADO             | 1,790,568  | 1,835,926  | 2,707,889          | 124,263            | 794,342    |
| CONNECTICUT          | 1,272,230  | 1,396,804  | 2,015,214          | 226,849            | 426,971    |
| DELAWARE             | 315,347    | 348,675    | 466,715            | 124,822            | 72,485     |
| DISTRICT OF COLUMBIA | 219,110    | 254,875    | 177,202            | 229,553            | 67,230     |
| FLORIDA              | 6,816,416  | 7,435,690  | 8,923,115          | 1,881,139          | 3,447,852  |
| GEORGIA              | 3,262,362  | 3,603,438  | 4,134,067          | 1,929,984          | 801,749    |
| HAWAII               | 506,818    | 515,603    | 264,111            | 15,345             | 742,965    |
| IDAHO                | 539,030    | 552,433    | 953,491            | 5,108              | 132,864    |
| ILLINOIS             | 4,539,711  | 4,892,239  | 6,404,947          | 1,253,504          | 1,773,499  |
| INDIANA              | 2,276,988  | 2,441,853  | 3,999,116          | 371,876            | 347,849    |
| IOWA                 | 1,097,495  | 1,153,519  | 2,061,812          | 49,706             | 139,496    |
| KANSAS               | 1,001,780  | 1,051,830  | 1,689,499          | 106,295            | 257,816    |
| KENTUCKY             | 1,536,992  | 1,661,361  | 2,838,803          | 220,891            | 138,659    |
| LOUISIANA            | 1,537,871  | 1,701,668  | 2,086,584          | 933,727            | 219,228    |
| MAINE                | 498,391    | 535,751    | 991,331            | 7,377              | 35,434     |
| MARYLAND             | 2,014,651  | 2,254,229  | 2,496,839          | 1,172,211          | 599,830    |
| MASSACHUSETTS        | 2,360,563  | 2,610,016  | 3,968,108          | 273,977            | 728,494    |
| MICHIGAN             | 3,566,768  | 3,853,711  | 5,912,830          | 949,969            | 557,680    |
| MINNESOTA            | 1,915,520  | 1,989,047  | 3,393,100          | 155,215            | 356,252    |
| MISSISSIPPI          | 1,002,069  | 1,129,150  | 1,320,365          | 723,858            | 86,996     |
| MISSOURI             | 2,110,481  | 2,294,931  | 3,685,051          | 451,352            | 269,009    |
| MONTANA              | 366,611    | 373,206    | 668,480            | 2,525              | 68,812     |
| NEBRASKA             | 647,280    | 676,058    | 1,141,107          | 51,209             | 131,022    |
| NEVADA               | 976,414    | 975,300    | 1,182,391          | 138,371            | 630,952    |
| NEW HAMPSHIRE        | 489,881    | 515,158    | 943,859            | 9,027              | 52,153     |
| NEW JERSEY           | 3,114,840  | 3,427,012  | 4,127,708          | 787,855            | 1,626,289  |
| NEW MEXICO           | 713,682    | 763,265    | 683,617            | 25,701             | 767,629    |
| NEW YORK             | 6,913,589  | 7,703,021  | 8,983,051          | 2,005,501          | 3,628,058  |
| NORTH CAROLINA       | 3,298,754  | 3,623,653  | 4,806,316          | 1,379,563          | 736,528    |
| NORTH DAKOTA         | 252,199    | 250,210    | 459,639            | 4,672              | 38,098     |
| OHIO                 | 4,101,826  | 4,480,273  | 7,207,183          | 929,494            | 445,422    |
| OKLAHOMA             | 1,304,473  | 1,395,408  | 1,995,990          | 175,859            | 528,032    |

|                                  |             |             |             |            |            |
|----------------------------------|-------------|-------------|-------------|------------|------------|
| OREGON                           | 1,394,819   | 1,467,707   | 2,373,217   | 42,473     | 446,836    |
| PENNSYLVANIA                     | 4,570,611   | 5,027,703   | 7,965,340   | 883,212    | 749,762    |
| RHODE ISLAND                     | 384,752     | 427,032     | 656,047     | 37,189     | 118,548    |
| SOUTH CAROLINA                   | 1,603,092   | 1,777,286   | 2,282,134   | 880,565    | 217,679    |
| SOUTH DAKOTA                     | 288,987     | 297,537     | 520,846     | 4,642      | 61,036     |
| TENNESSEE                        | 2,225,382   | 2,440,040   | 3,678,866   | 701,534    | 285,022    |
| TEXAS                            | 8,363,843   | 8,905,195   | 8,787,032   | 1,902,726  | 6,579,280  |
| UTAH                             | 891,862     | 912,575     | 1,505,769   | 14,853     | 283,815    |
| VERMONT                          | 236,618     | 249,805     | 464,243     | 3,439      | 18,741     |
| VIRGINIA                         | 2,837,688   | 3,062,849   | 4,030,387   | 1,068,759  | 801,391    |
| WASHINGTON                       | 2,429,478   | 2,515,855   | 3,818,362   | 153,775    | 973,196    |
| WEST VIRGINIA                    | 687,995     | 737,092     | 1,346,333   | 39,847     | 38,907     |
| WISCONSIN                        | 2,060,258   | 2,159,687   | 3,678,303   | 210,865    | 330,777    |
| WYOMING                          | 206,493     | 202,489     | 361,081     | 2,816      | 45,085     |
| U.S. STATES &<br>WASHINGTON D.C. | 108,855,941 | 117,173,382 | 153,854,961 | 25,514,106 | 46,660,256 |

<sup>a</sup>The 2006-2010 5-year sample is a 5% random sample of the national population comprised of all persons from the 1% American Community Survey samples from 2006, 2007, 2008, 2009 and 2010. Individuals from institutionalized group quarters have been removed (1, 2).

Table S2. Estimated Total and Prevalence Rate with HCV Antibodies by Sex, US States and District of Columbia, 2010

| State                | Female                             |          |       |                             |          |          | Male                               |          |       |                             |          |          | Rate Ratio (ref=Female) |          |       |
|----------------------|------------------------------------|----------|-------|-----------------------------|----------|----------|------------------------------------|----------|-------|-----------------------------|----------|----------|-------------------------|----------|-------|
|                      | Anti-HCV Prevalence Rate (per 100) |          |       | Total Persons with Anti-HCV |          |          | Anti-HCV Prevalence Rate (per 100) |          |       | Total Persons with Anti-HCV |          |          | Ratio                   | (95% CI) |       |
|                      | Rate                               | (95% CI) |       | n                           | (95% CI) |          | Rate                               | (95% CI) |       | n                           | (95% CI) |          |                         |          |       |
| ALABAMA              | 1.09                               | 0.90     | 1.38  | 20,233                      | (16,727  | 25,610)  | 1.86                               | (1.63    | 2.17) | 30,937                      | (27,039  | 36,081)  | 1.71                    | (1.30    | 2.19) |
| ALASKA               | 2.22                               | (1.65    | 3.24) | 5,341                       | (3,963   | 7,816)   | 2.13                               | (1.78    | 2.69) | 5,531                       | (4,614   | 6,969)   | 0.96                    | (0.65    | 1.39) |
| ARIZONA              | 1.30                               | (1.06    | 1.67) | 30,306                      | (24,785  | 38,992)  | 2.55                               | (2.23    | 2.98) | 56,686                      | (49,468  | 66,146)  | 1.97                    | (1.48    | 2.55) |
| ARKANSAS             | 1.18                               | (0.94    | 1.56) | 13,021                      | (10,351  | 17,243)  | 2.28                               | (1.96    | 2.71) | 23,255                      | (19,901  | 27,552)  | 1.94                    | (1.41    | 2.58) |
| CALIFORNIA           | 1.69                               | (1.43    | 2.12) | 233,188                     | (196,641 | 292,405) | 2.97                               | (2.64    | 3.42) | 390,773                     | (347,416 | 450,511) | 1.75                    | (1.35    | 2.20) |
| COLORADO             | 1.29                               | (1.06    | 1.64) | 23,599                      | (19,419  | 30,189)  | 2.30                               | (2.02    | 2.68) | 41,240                      | (36,208  | 47,962)  | 1.79                    | (1.35    | 2.30) |
| CONNECTICUT          | 0.92                               | (0.77    | 1.17) | 12,867                      | (10,802  | 16,276)  | 1.85                               | (1.63    | 2.14) | 23,475                      | (20,730  | 27,221)  | 2.00                    | (1.54    | 2.52) |
| DELAWARE             | 1.43                               | (1.16    | 1.88) | 4,977                       | (4,043   | 6,558)   | 2.61                               | (2.25    | 3.13) | 8,216                       | (7,096   | 9,868)   | 1.83                    | (1.34    | 2.41) |
| DISTRICT OF COLUMBIA | 3.06                               | (2.44    | 3.96) | 7,790                       | (6,216   | 10,091)  | 3.93                               | (3.32    | 4.81) | 8,621                       | (7,284   | 10,529)  | 1.29                    | (0.94    | 1.74) |
| FLORIDA              | 1.21                               | (1.00    | 1.53) | 89,662                      | (74,422  | 113,440) | 2.21                               | (1.94    | 2.56) | 150,765                     | (132,145 | 174,689) | 1.83                    | (1.41    | 2.34) |
| GEORGIA              | 0.86                               | (0.72    | 1.07) | 31,012                      | (25,969  | 38,465)  | 1.57                               | (1.38    | 1.81) | 51,222                      | (45,034  | 59,195)  | 1.82                    | (1.42    | 2.30) |
| HAWAII               | 0.80                               | (0.63    | 1.14) | 4,138                       | (3,232   | 5,876)   | 1.99                               | (1.71    | 2.38) | 10,085                      | (8,687   | 12,061)  | 2.48                    | (1.69    | 3.38) |
| IDAHO                | 1.14                               | (0.87    | 1.61) | 6,315                       | (4,787   | 8,881)   | 1.76                               | (1.48    | 2.15) | 9,467                       | (7,979   | 11,577)  | 1.54                    | (1.05    | 2.18) |
| ILLINOIS             | 0.56                               | (0.48    | 0.70) | 27,410                      | (23,298  | 34,045)  | 0.90                               | (0.80    | 1.04) | 41,034                      | (36,311  | 47,240)  | 1.61                    | (1.26    | 2.01) |
| INDIANA              | 0.91                               | (0.74    | 1.17) | 22,192                      | (18,051  | 28,498)  | 1.56                               | (1.35    | 1.83) | 35,469                      | (30,784  | 41,606)  | 1.71                    | (1.29    | 2.25) |
| IOWA                 | 0.70                               | (0.54    | 0.96) | 8,031                       | (6,179   | 11,035)  | 1.45                               | (1.24    | 1.75) | 15,965                      | (13,642  | 19,196)  | 2.09                    | (1.47    | 2.89) |
| KANSAS               | 1.01                               | (0.80    | 1.35) | 10,584                      | (8,405   | 14,169)  | 1.86                               | (1.59    | 2.21) | 18,610                      | (15,954  | 22,142)  | 1.85                    | (1.34    | 2.48) |
| KENTUCKY             | 1.17                               | (0.92    | 1.55) | 19,503                      | (15,346  | 25,804)  | 2.12                               | (1.81    | 2.55) | 32,651                      | (27,786  | 39,152)  | 1.81                    | (1.31    | 2.45) |
| LOUISIANA            | 1.67                               | (1.41    | 2.06) | 28,440                      | (23,977  | 35,034)  | 2.92                               | (2.58    | 3.37) | 44,881                      | (39,736  | 51,797)  | 1.75                    | (1.38    | 2.19) |
| MAINE                | 0.58                               | (0.42    | 0.89) | 3,121                       | (2,239   | 4,771)   | 1.59                               | (1.32    | 1.99) | 7,947                       | (6,571   | 9,918)   | 2.74                    | (1.71    | 4.10) |
| MARYLAND             | 1.54                               | (1.31    | 1.87) | 34,645                      | (29,460  | 42,188)  | 2.27                               | (2.01    | 2.60) | 45,665                      | (40,560  | 52,363)  | 1.47                    | (1.17    | 1.82) |
| MASSACHUSETTS        | 1.04                               | (0.85    | 1.33) | 27,173                      | (22,289  | 34,714)  | 1.92                               | (1.68    | 2.23) | 45,262                      | (39,766  | 52,662)  | 1.84                    | (1.39    | 2.37) |
| MICHIGAN             | 1.00                               | (0.84    | 1.24) | 38,540                      | (32,554  | 47,629)  | 1.75                               | (1.54    | 2.01) | 62,259                      | (55,040  | 71,638)  | 1.75                    | (1.37    | 2.17) |
| MINNESOTA            | 0.69                               | (0.57    | 0.89) | 13,713                      | (11,270  | 17,643)  | 1.38                               | (1.21    | 1.61) | 26,473                      | (23,212  | 30,846)  | 2.00                    | (1.51    | 2.58) |
| MISSISSIPPI          | 1.15                               | (0.94    | 1.48) | 12,960                      | (10,605  | 16,675)  | 2.14                               | (1.85    | 2.53) | 21,429                      | (18,567  | 25,364)  | 1.86                    | (1.39    | 2.42) |
| MISSOURI             | 1.20                               | (0.98    | 1.52) | 27,472                      | (22,575  | 34,848)  | 2.24                               | (1.95    | 2.61) | 47,257                      | (41,244  | 55,162)  | 1.87                    | (1.42    | 2.41) |
| MONTANA              | 1.65                               | (1.25    | 2.31) | 6,147                       | (4,672   | 8,611)   | 2.13                               | (1.79    | 2.62) | 7,794                       | (6,566   | 9,611)   | 1.29                    | (0.88    | 1.83) |
| NEBRASKA             | 0.89                               | (0.70    | 1.21) | 6,002                       | (4,745   | 8,149)   | 1.50                               | (1.28    | 1.81) | 9,691                       | (8,314   | 11,691)  | 1.69                    | (1.20    | 2.28) |

|                                  |       |       |       |           |            |            |      |       |       |           |            |            |       |       |       |
|----------------------------------|-------|-------|-------|-----------|------------|------------|------|-------|-------|-----------|------------|------------|-------|-------|-------|
| NEVADA                           | 1.18  | (0.94 | 1.55) | 11,466    | (9,187     | 15,155)    | 2.48 | (2.14 | 2.93) | 24,246    | (20,938    | 28,629)    | 2.11  | (1.54 | 2.79) |
| NEW HAMPSHIRE                    | 0.70  | (0.50 | 1.05) | 3,587     | (2,588     | 5,406)     | 1.49 | (1.24 | 1.87) | 7,320     | (6,072     | 9,141)     | 2.15  | (1.36 | 3.22) |
| NEW JERSEY                       | 1.03  | (0.88 | 1.27) | 35,219    | (29,985    | 43,474)    | 1.76 | (1.56 | 2.01) | 54,728    | (48,633    | 62,755)    | 1.71  | (1.35 | 2.12) |
| NEW MEXICO                       | 1.87  | (1.50 | 2.50) | 14,305    | (11,461    | 19,106)    | 3.83 | (3.27 | 4.67) | 27,355    | (23,371    | 33,296)    | 2.05  | (1.47 | 2.75) |
| NEW YORK                         | 1.12  | (0.97 | 1.37) | 86,482    | (74,843    | 105,194)   | 2.00 | (1.80 | 2.28) | 138,393   | (124,610   | 157,335)   | 1.78  | (1.42 | 2.17) |
| NORTH CAROLINA                   | 1.10  | (0.92 | 1.37) | 40,001    | (33,417    | 49,666)    | 2.21 | (1.96 | 2.55) | 73,062    | (64,529    | 84,054)    | 2.01  | (1.56 | 2.52) |
| NORTH DAKOTA                     | 0.53* | (0.37 | 0.92) | 1,319*    | (915       | 2,304)     | 1.08 | (0.88 | 1.45) | 2,725     | (2,224     | 3,651)     | 2.05* | (1.14 | 3.26) |
| OHIO                             | 0.95  | (0.80 | 1.19) | 42,581    | (35,631    | 53,108)    | 1.82 | (1.60 | 2.09) | 74,487    | (65,523    | 85,825)    | 1.91  | (1.49 | 2.41) |
| OKLAHOMA                         | 2.73  | (2.18 | 3.55) | 38,057    | (30,429    | 49,499)    | 3.92 | (3.39 | 4.60) | 51,118    | (44,186    | 59,967)    | 1.44  | (1.07 | 1.90) |
| OREGON                           | 2.29  | (1.79 | 3.05) | 33,605    | (26,280    | 44,727)    | 3.88 | (3.32 | 4.60) | 54,170    | (46,369    | 64,166)    | 1.70  | (1.23 | 2.31) |
| PENNSYLVANIA                     | 0.98  | (0.82 | 1.21) | 49,122    | (41,395    | 60,770)    | 1.94 | (1.72 | 2.24) | 88,889    | (78,595    | 102,231)   | 1.99  | (1.56 | 2.48) |
| RHODE ISLAND                     | 1.65  | (1.31 | 2.22) | 7,027     | (5,596     | 9,459)     | 2.66 | (2.29 | 3.18) | 10,223    | (8,818     | 12,232)    | 1.61  | (1.16 | 2.17) |
| SOUTH CAROLINA                   | 1.26  | (1.04 | 1.58) | 22,352    | (18,537    | 28,127)    | 2.36 | (2.07 | 2.74) | 37,832    | (33,178    | 43,851)    | 1.88  | (1.45 | 2.40) |
| SOUTH DAKOTA                     | 0.71  | (0.52 | 1.13) | 2,116     | (1,534     | 3,348)     | 1.27 | (1.05 | 1.65) | 3,680     | (3,040     | 4,765)     | 1.79  | (1.10 | 2.70) |
| TENNESSEE                        | 1.77  | (1.44 | 2.26) | 43,255    | (35,130    | 55,063)    | 3.38 | (2.92 | 3.96) | 75,138    | (65,086    | 88,137)    | 1.90  | (1.44 | 2.49) |
| TEXAS                            | 1.52  | (1.30 | 1.88) | 135,504   | (115,880   | 167,080)   | 2.76 | (2.46 | 3.17) | 231,081   | (205,461   | 265,116)   | 1.82  | (1.43 | 2.25) |
| UTAH                             | 0.69  | (0.53 | 0.95) | 6,275     | (4,875     | 8,705)     | 1.23 | (1.04 | 1.49) | 10,927    | (9,290     | 13,248)    | 1.78  | (1.24 | 2.47) |
| VERMONT                          | 0.96  | (0.67 | 1.54) | 2,400     | (1,671     | 3,837)     | 2.00 | (1.61 | 2.57) | 4,726     | (3,820     | 6,084)     | 2.08* | (1.25 | 3.22) |
| VIRGINIA                         | 0.74  | (0.62 | 0.92) | 22,553    | (18,960    | 28,052)    | 1.50 | (1.33 | 1.73) | 42,570    | (37,602    | 49,035)    | 2.04  | (1.60 | 2.55) |
| WASHINGTON                       | 1.69  | (1.35 | 2.20) | 42,537    | (34,046    | 55,267)    | 2.96 | (2.57 | 3.47) | 72,024    | (62,446    | 84,274)    | 1.75  | (1.30 | 2.33) |
| WEST VIRGINIA                    | 1.11  | (0.83 | 1.57) | 8,174     | (6,138     | 11,586)    | 2.20 | (1.84 | 2.71) | 15,164    | (12,673    | 18,622)    | 1.99  | (1.35 | 2.83) |
| WISCONSIN                        | 0.49  | (0.40 | 0.64) | 10,658    | (8,743     | 13,767)    | 0.97 | (0.84 | 1.13) | 19,893    | (17,356    | 23,323)    | 1.96  | (1.46 | 2.53) |
| WYOMING                          | 1.56  | (1.13 | 2.41) | 3,159     | (2,285     | 4,876)     | 2.10 | (1.70 | 2.73) | 4,342     | (3,513     | 5,640)     | 1.35  | (0.84 | 2.04) |
| U.S. STATES &<br>WASHINGTON D.C. | 1.22  | (1.04 | 1.51) | 1,430,132 | (1,215,849 | 1,774,777) | 2.20 | (1.96 | 2.52) | 2,396,753 | (2,132,310 | 2,747,709) | 1.80  | (1.42 | 2.24) |

Abbreviations: CI, confidence interval; anti-HCV, hepatitis C virus antibody

\*Coefficient of variation is  $\geq 23\%$ ; estimate is unreliable.

Table S3. Estimated Total and Prevalence Rate with Hepatitis C Antibodies among non-Hispanic White Persons, US States and District of Columbia, 2010

| State                | anti-HCV Prevalence<br>Rate (per 100) |          |       | Total Persons with anti-HCV |          |          |
|----------------------|---------------------------------------|----------|-------|-----------------------------|----------|----------|
|                      | Rate                                  | (95% CI) |       | n                           | (95% CI) |          |
| ALABAMA              | 1.46                                  | (1.26    | 1.74) | 36,129                      | (31,224  | 43,001)  |
| ALASKA               | 2.52                                  | (2.07    | 3.23) | 8,631                       | (7,104   | 11,056)  |
| ARIZONA              | 2.10                                  | (1.82    | 2.47) | 61,726                      | (53,560  | 72,666)  |
| ARKANSAS             | 1.80                                  | (1.54    | 2.15) | 29,842                      | (25,607  | 35,705)  |
| CALIFORNIA           | 2.92                                  | (2.54    | 3.41) | 358,117                     | (311,925 | 419,237) |
| COLORADO             | 1.58                                  | (1.36    | 1.87) | 42,887                      | (36,920  | 50,689)  |
| CONNECTICUT          | 1.11                                  | (0.95    | 1.32) | 22,340                      | (19,240  | 26,653)  |
| DELAWARE             | 1.69                                  | (1.42    | 2.10) | 7,865                       | (6,627   | 9,795)   |
| DISTRICT OF COLUMBIA | 0.69                                  | (0.55    | 0.96) | 1,224                       | (967     | 1,696)   |
| FLORIDA              | 1.99                                  | (1.73    | 2.34) | 177,752                     | (154,594 | 208,475) |
| GEORGIA              | 1.28                                  | (1.11    | 1.51) | 52,928                      | (45,795  | 62,425)  |
| HAWAII               | 3.43                                  | (2.91    | 4.20) | 9,048                       | (7,674   | 11,087)  |
| IDAHO                | 1.46                                  | (1.23    | 1.80) | 13,918                      | (11,770  | 17,130)  |
| ILLINOIS             | 0.68                                  | (0.59    | 0.80) | 43,322                      | (37,525  | 51,292)  |
| INDIANA              | 1.13                                  | (0.97    | 1.34) | 45,056                      | (38,963  | 53,451)  |
| IOWA                 | 1.01                                  | (0.86    | 1.21) | 20,725                      | (17,747  | 25,028)  |
| KANSAS               | 1.39                                  | (1.19    | 1.68) | 23,541                      | (20,123  | 28,351)  |
| KENTUCKY             | 1.58                                  | (1.35    | 1.89) | 44,916                      | (38,414  | 53,690)  |
| LOUISIANA            | 2.03                                  | (1.76    | 2.41) | 42,411                      | (36,679  | 50,204)  |
| MAINE                | 1.07                                  | (0.91    | 1.33) | 10,606                      | (8,979   | 13,163)  |
| MARYLAND             | 1.46                                  | (1.26    | 1.74) | 36,527                      | (31,450  | 43,426)  |
| MASSACHUSETTS        | 1.34                                  | (1.15    | 1.58) | 53,013                      | (45,815  | 62,671)  |
| MICHIGAN             | 1.07                                  | (0.93    | 1.26) | 63,316                      | (54,783  | 74,608)  |
| MINNESOTA            | 0.83                                  | (0.71    | 0.98) | 28,013                      | (24,106  | 33,262)  |
| MISSISSIPPI          | 1.88                                  | (1.61    | 2.26) | 24,834                      | (21,288  | 29,805)  |
| MISSOURI             | 1.53                                  | (1.33    | 1.81) | 56,542                      | (49,022  | 66,784)  |
| MONTANA              | 1.73                                  | (1.44    | 2.15) | 11,532                      | (9,615   | 14,369)  |
| NEBRASKA             | 1.03                                  | (0.87    | 1.27) | 11,780                      | (9,923   | 14,492)  |
| NEVADA               | 2.36                                  | (2.02    | 2.81) | 27,871                      | (23,915  | 33,221)  |
| NEW HAMPSHIRE        | 1.09                                  | (0.92    | 1.36) | 10,308                      | (8,695   | 12,857)  |
| NEW JERSEY           | 1.34                                  | (1.16    | 1.58) | 55,382                      | (48,083  | 65,293)  |
| NEW MEXICO           | 2.65                                  | (2.28    | 3.15) | 18,139                      | (15,594  | 21,551)  |
| NEW YORK             | 1.12                                  | (0.98    | 1.32) | 100,870                     | (87,864  | 118,215) |
| NORTH CAROLINA       | 1.53                                  | (1.32    | 1.79) | 73,366                      | (63,571  | 85,936)  |
| NORTH DAKOTA         | 0.71                                  | (0.57    | 0.98) | 3,253                       | (2,606   | 4,525)   |
| OHIO                 | 1.11                                  | (0.97    | 1.31) | 80,145                      | (69,659  | 94,440)  |
| OKLAHOMA             | 3.70                                  | (3.19    | 4.39) | 73,890                      | (63,706  | 87,719)  |

|                                  |      |       |       |           |            |            |
|----------------------------------|------|-------|-------|-----------|------------|------------|
| OREGON                           | 3.30 | (2.85 | 3.91) | 78,348    | (67,582    | 92,724)    |
| PENNSYLVANIA                     | 1.14 | (0.99 | 1.34) | 90,679    | (78,809    | 106,418)   |
| RHODE ISLAND                     | 1.93 | (1.63 | 2.37) | 12,665    | (10,678    | 15,526)    |
| SOUTH CAROLINA                   | 1.78 | (1.54 | 2.11) | 40,703    | (35,115    | 48,218)    |
| SOUTH DAKOTA                     | 0.85 | (0.69 | 1.14) | 4,451     | (3,600     | 5,933)     |
| TENNESSEE                        | 2.56 | (2.22 | 3.03) | 94,360    | (81,826    | 111,377)   |
| TEXAS                            | 2.35 | (2.05 | 2.76) | 206,810   | (180,089   | 242,120)   |
| UTAH                             | 0.94 | (0.80 | 1.15) | 14,121    | (11,990    | 17,260)    |
| VERMONT                          | 1.47 | (1.22 | 1.90) | 6,826     | (5,676     | 8,800)     |
| VIRGINIA                         | 1.00 | (0.87 | 1.18) | 40,295    | (34,884    | 47,569)    |
| WASHINGTON                       | 2.44 | (2.11 | 2.88) | 93,212    | (80,516    | 110,023)   |
| WEST VIRGINIA                    | 1.60 | (1.35 | 1.95) | 21,511    | (18,202    | 26,250)    |
| WISCONSIN                        | 0.59 | (0.51 | 0.71) | 21,815    | (18,771    | 26,125)    |
| WYOMING                          | 1.80 | (1.47 | 2.36) | 6,503     | (5,301     | 8,535)     |
| U.S. STATES &<br>WASHINGTON D.C. | 1.63 | (1.43 | 1.91) | 2,514,068 | (2,197,215 | 2,942,026) |

Abbreviations: CI, confidence interval; anti-HCV, hepatitis C virus antibody

\*Coefficient of variation is  $\geq 23\%$ ; estimate is unreliable.

Table S4. Estimated Total and Prevalence Rate with Hepatitis C Antibodies among non-Hispanic Black Persons, US States and District of Columbia, 2010

| State                | anti-HCV Prevalence<br>Rate (per 100) |          |       | Total Persons with anti-HCV |          |        | Rate Ratio (ref=white) |          |       |
|----------------------|---------------------------------------|----------|-------|-----------------------------|----------|--------|------------------------|----------|-------|
|                      | Rate                                  | (95% CI) |       | n                           | (95% CI) |        | Ratio                  | (95% CI) |       |
| ALABAMA              | 1.69                                  | 1.47     | 2.02  | 14,420                      | 12,504   | 17,159 | 1.16                   | 0.93     | 1.45  |
| ALASKA               | 2.77                                  | 2.02     | 4.39  | 431                         | 314      | 682    | 1.10                   | 0.80     | 1.68  |
| ARIZONA              | 2.93                                  | 2.49     | 3.54  | 4,504                       | 3,826    | 5,447  | 1.39                   | 1.11     | 1.77  |
| ARKANSAS             | 1.99                                  | 1.71     | 2.41  | 5,886                       | 5,045    | 7,118  | 1.11                   | 0.88     | 1.41  |
| CALIFORNIA           | 5.05                                  | 4.42     | 5.89  | 77,497                      | 67,837   | 90,369 | 1.73                   | 1.41     | 2.13  |
| COLORADO             | 4.52                                  | 3.88     | 5.39  | 5,620                       | 4,820    | 6,698  | 2.86                   | 2.27     | 3.59  |
| CONNECTICUT          | 3.21                                  | 2.76     | 3.84  | 7,292                       | 6,263    | 8,714  | 2.90                   | 2.30     | 3.65  |
| DELAWARE             | 3.90                                  | 3.31     | 4.79  | 4,871                       | 4,130    | 5,984  | 2.32                   | 1.76     | 3.02  |
| DISTRICT OF COLUMBIA | 6.48                                  | 5.59     | 7.78  | 14,881                      | 12,826   | 17,858 | 9.38                   | 6.59     | 12.63 |
| FLORIDA              | 1.89                                  | 1.65     | 2.21  | 35,484                      | 30,967   | 41,637 | 0.95                   | 0.77     | 1.17  |
| GEORGIA              | 1.42                                  | 1.23     | 1.67  | 27,355                      | 23,761   | 32,215 | 1.11                   | 0.89     | 1.38  |
| HAWAII               | 2.76                                  | 2.09     | 3.95  | 423                         | 321      | 606    | 0.80                   | 0.57     | 1.18  |
| IDAHO                | 1.67*                                 | 0.94     | 4.16  | 85*                         | 48       | 212    | 1.14*                  | 0.61     | 2.86  |
| ILLINOIS             | 1.58                                  | 1.38     | 1.86  | 19,824                      | 17,302   | 23,305 | 2.34                   | 1.89     | 2.89  |
| INDIANA              | 2.95                                  | 2.56     | 3.51  | 10,988                      | 9,534    | 13,057 | 2.62                   | 2.10     | 3.28  |
| IOWA                 | 3.97                                  | 3.29     | 4.98  | 1,973                       | 1,634    | 2,477  | 3.95                   | 3.04     | 5.20  |
| KANSAS               | 3.18                                  | 2.70     | 3.88  | 3,384                       | 2,867    | 4,125  | 2.28                   | 1.79     | 2.93  |
| KENTUCKY             | 2.94                                  | 2.51     | 3.58  | 6,503                       | 5,547    | 7,900  | 1.86                   | 1.47     | 2.38  |
| LOUISIANA            | 3.16                                  | 2.76     | 3.73  | 29,527                      | 25,756   | 34,788 | 1.56                   | 1.26     | 1.93  |
| MAINE                | 2.76*                                 | 1.87     | 4.69  | 203*                        | 138      | 346    | 2.58*                  | 1.63     | 4.46  |
| MARYLAND             | 3.54                                  | 3.09     | 4.16  | 41,527                      | 36,169   | 48,777 | 2.42                   | 1.94     | 3.01  |
| MASSACHUSETTS        | 3.44                                  | 2.98     | 4.11  | 9,423                       | 8,151    | 11,252 | 2.57                   | 2.06     | 3.22  |
| MICHIGAN             | 3.46                                  | 3.02     | 4.07  | 32,902                      | 28,666   | 38,644 | 3.23                   | 2.61     | 4.00  |
| MINNESOTA            | 4.96                                  | 4.24     | 5.95  | 7,696                       | 6,587    | 9,241  | 6.01                   | 4.76     | 7.58  |
| MISSISSIPPI          | 1.25                                  | 1.07     | 1.50  | 9,032                       | 7,776    | 10,851 | 0.66                   | 0.52     | 0.84  |
| MISSOURI             | 3.58                                  | 3.12     | 4.23  | 16,180                      | 14,088   | 19,069 | 2.34                   | 1.88     | 2.91  |
| MONTANA              | 5.93*                                 | 3.89     | 10.70 | 150*                        | 98       | 270    | 3.44*                  | 2.12     | 6.35  |
| NEBRASKA             | 5.02                                  | 4.20     | 6.30  | 2,573                       | 2,152    | 3,225  | 4.87                   | 3.71     | 6.46  |
| NEVADA               | 2.32                                  | 1.96     | 2.81  | 3,208                       | 2,717    | 3,894  | 0.98                   | 0.77     | 1.25  |
| NEW HAMPSHIRE        | 2.53*                                 | 1.71     | 4.24  | 228*                        | 154      | 383    | 2.31*                  | 1.47     | 3.92  |
| NEW JERSEY           | 2.99                                  | 2.62     | 3.51  | 23,581                      | 20,622   | 27,651 | 2.23                   | 1.81     | 2.75  |
| NEW MEXICO           | 3.17                                  | 2.55     | 4.16  | 815                         | 656      | 1,070  | 1.20                   | 0.91     | 1.62  |
| NEW YORK             | 3.39                                  | 2.97     | 3.95  | 67,976                      | 59,482   | 79,184 | 3.02                   | 2.45     | 3.71  |
| NORTH CAROLINA       | 2.60                                  | 2.26     | 3.06  | 35,804                      | 31,203   | 42,176 | 1.70                   | 1.37     | 2.10  |
| NORTH DAKOTA         | 0.94*                                 | 0.50     | 2.94  | 44*                         | 24       | 137    | 1.33*                  | 0.65     | 4.16  |
| OHIO                 | 3.66                                  | 3.20     | 4.29  | 34,048                      | 29,781   | 39,894 | 3.29                   | 2.67     | 4.06  |
| OKLAHOMA             | 3.17                                  | 2.72     | 3.80  | 5,568                       | 4,775    | 6,674  | 0.86                   | 0.68     | 1.08  |

|                                  |       |       |       |         |          |          |       |       |       |
|----------------------------------|-------|-------|-------|---------|----------|----------|-------|-------|-------|
| OREGON                           | 6.00  | (5.06 | 7.33) | 2,549   | (2,149   | 3,114)   | 1.82  | (1.43 | 2.33) |
| PENNSYLVANIA                     | 4.27  | (3.73 | 5.01) | 37,683  | (32,918  | 44,249)  | 3.75  | (3.04 | 4.62) |
| RHODE ISLAND                     | 6.46  | (5.41 | 8.07) | 2,403   | (2,014   | 3,001)   | 3.35  | (2.55 | 4.39) |
| SOUTH CAROLINA                   | 2.07  | (1.80 | 2.43) | 18,209  | (15,810  | 21,420)  | 1.16  | (0.93 | 1.44) |
| SOUTH DAKOTA                     | 3.69* | (2.46 | 6.68) | 171*    | (114     | 310)     | 4.32* | (2.61 | 8.07) |
| TENNESSEE                        | 3.20  | (2.77 | 3.78) | 22,414  | (19,416  | 26,538)  | 1.25  | (1.00 | 1.56) |
| TEXAS                            | 3.75  | (3.27 | 4.42) | 71,381  | (62,222  | 83,999)  | 1.59  | (1.29 | 1.97) |
| UTAH                             | 3.14  | (2.34 | 4.54) | 467     | (347     | 674)     | 3.35  | (2.34 | 4.97) |
| VERMONT                          | 3.14* | (2.05 | 5.86) | 108*    | (70      | 202)     | 2.13* | (1.29 | 4.04) |
| VIRGINIA                         | 2.03  | (1.77 | 2.39) | 21,701  | (18,871  | 25,518)  | 2.03  | (1.64 | 2.51) |
| WASHINGTON                       | 5.38  | (4.65 | 6.38) | 8,266   | (7,144   | 9,806)   | 2.20  | (1.77 | 2.75) |
| WEST VIRGINIA                    | 4.32  | (3.58 | 5.42) | 1,719   | (1,428   | 2,159)   | 2.70  | (2.05 | 3.58) |
| WISCONSIN                        | 3.11  | (2.67 | 3.73) | 6,557   | (5,628   | 7,868)   | 5.24  | (4.15 | 6.62) |
| WYOMING                          | 2.23* | (1.34 | 5.27) | 63*     | (38      | 148)     | 1.24* | (0.69 | 2.95) |
| U.S. STATES &<br>WASHINGTON D.C. | 2.96  | (2.60 | 3.46) | 755,596 | (663,906 | 882,217) | 1.81  | (1.48 | 2.22) |

Abbreviations: CI, confidence interval; anti-HCV, hepatitis C virus antibody

\*Coefficient of variation is  $\geq 23\%$ ; estimate is unreliable.

Table S5. Estimated Total and Prevalence Rate with Hepatitis C Antibodies among Hispanic Persons, US States and District of Columbia, 2010.

| State                | anti-HCV Prevalence<br>Rate (per 100) |          |       | Total Persons with anti-HCV |          |          | Rate Ratio<br>(ref=white) |          |       |
|----------------------|---------------------------------------|----------|-------|-----------------------------|----------|----------|---------------------------|----------|-------|
|                      | Rate                                  | (95% CI) |       | n                           | (95% CI) |          | Ratio                     | (95% CI) |       |
| ALABAMA              | 0.32                                  | 0.25     | 0.45) | 620                         | (479     | 872)     | 0.22                      | 0.16     | 0.32) |
| ALASKA               | 1.27                                  | 0.97     | 1.86) | 1,810                       | (1,378   | 2,645)   | 0.50                      | 0.38     | 0.72) |
| ARIZONA              | 1.43                                  | 1.17     | 1.83) | 20,762                      | (17,062  | 26,667)  | 0.68                      | 0.53     | 0.91) |
| ARKANSAS             | 0.33                                  | 0.25     | 0.48) | 547                         | (417     | 784)     | 0.19                      | 0.13     | 0.27) |
| CALIFORNIA           | 1.44                                  | 1.19     | 1.84) | 188,347                     | (156,015 | 241,748) | 0.49                      | 0.39     | 0.66) |
| COLORADO             | 2.06                                  | 1.70     | 2.64) | 16,332                      | (13,478  | 20,931)  | 1.30                      | 1.01     | 1.74) |
| CONNECTICUT          | 1.57                                  | 1.28     | 2.06) | 6,710                       | (5,451   | 8,802)   | 1.42                      | 1.08     | 1.92) |
| DELAWARE             | 0.63                                  | 0.47     | 0.95) | 457                         | (341     | 692)     | 0.37                      | 0.26     | 0.58) |
| DISTRICT OF COLUMBIA | 0.45                                  | 0.34     | 0.69) | 305                         | (227     | 467)     | 0.66*                     | 0.42     | 1.06) |
| FLORIDA              | 0.79                                  | 0.65     | 1.02) | 27,191                      | (22,477  | 35,041)  | 0.40                      | 0.31     | 0.53) |
| GEORGIA              | 0.24                                  | 0.19     | 0.32) | 1,950                       | (1,557   | 2,603)   | 0.19                      | 0.14     | 0.26) |
| HAWAII               | 0.64                                  | 0.52     | 0.86) | 4,752                       | (3,831   | 6,382)   | 0.19                      | 0.14     | 0.26) |
| IDAHO                | 1.34                                  | 1.07     | 1.82) | 1,779                       | (1,421   | 2,421)   | 0.92                      | 0.68     | 1.31) |
| ILLINOIS             | 0.30                                  | 0.24     | 0.40) | 5,298                       | (4,313   | 7,028)   | 0.44                      | 0.34     | 0.60) |
| INDIANA              | 0.46                                  | 0.37     | 0.63) | 1,616                       | (1,298   | 2,178)   | 0.41                      | 0.31     | 0.57) |
| IOWA                 | 0.93                                  | 0.73     | 1.30) | 1,298                       | (1,014   | 1,809)   | 0.93                      | 0.68     | 1.34) |
| KANSAS               | 0.88                                  | 0.70     | 1.18) | 2,269                       | (1,811   | 3,053)   | 0.63                      | 0.47     | 0.88) |
| KENTUCKY             | 0.53                                  | 0.40     | 0.77) | 734                         | (554     | 1,071)   | 0.33                      | 0.24     | 0.50) |
| LOUISIANA            | 0.63                                  | 0.51     | 0.85) | 1,382                       | (1,115   | 1,857)   | 0.31                      | 0.24     | 0.43) |
| MAINE                | 0.73                                  | 0.53     | 1.14) | 259                         | (186     | 403)     | 0.68                      | 0.46     | 1.10) |
| MARYLAND             | 0.38                                  | 0.30     | 0.50) | 2,257                       | (1,827   | 2,996)   | 0.26                      | 0.20     | 0.35) |
| MASSACHUSETTS        | 1.37                                  | 1.12     | 1.79) | 9,998                       | (8,150   | 13,019)  | 1.03                      | 0.79     | 1.39) |
| MICHIGAN             | 0.82                                  | 0.67     | 1.06) | 4,581                       | (3,749   | 5,914)   | 0.77                      | 0.59     | 1.03) |
| MINNESOTA            | 1.26                                  | 1.02     | 1.64) | 4,477                       | (3,632   | 5,852)   | 1.52                      | 1.17     | 2.06) |
| MISSISSIPPI          | 0.60                                  | 0.46     | 0.87) | 523                         | (399     | 761)     | 0.32                      | 0.23     | 0.47) |
| MISSOURI             | 0.75                                  | 0.60     | 0.98) | 2,006                       | (1,622   | 2,647)   | 0.49                      | 0.37     | 0.67) |
| MONTANA              | 3.28                                  | 2.61     | 4.47) | 2,259                       | (1,797   | 3,075)   | 1.90                      | 1.40     | 2.71) |
| NEBRASKA             | 1.02                                  | 0.80     | 1.44) | 1,340                       | (1,045   | 1,890)   | 0.99                      | 0.71     | 1.45) |
| NEVADA               | 0.73                                  | 0.60     | 0.96) | 4,633                       | (3,775   | 6,047)   | 0.31                      | 0.24     | 0.42) |
| NEW HAMPSHIRE        | 0.71                                  | 0.52     | 1.07) | 371                         | (274     | 561)     | 0.65                      | 0.45     | 1.02) |
| NEW JERSEY           | 0.68                                  | 0.56     | 0.87) | 10,984                      | (9,071   | 14,180)  | 0.50                      | 0.39     | 0.68) |
| NEW MEXICO           | 2.96                                  | 2.43     | 3.84) | 22,705                      | (18,674  | 29,454)  | 1.11                      | 0.86     | 1.51) |
| NEW YORK             | 1.54                                  | 1.28     | 1.98) | 56,029                      | (46,489  | 71,958)  | 1.38                      | 1.07     | 1.83) |
| NORTH CAROLINA       | 0.53                                  | 0.42     | 0.70) | 3,893                       | (3,126   | 5,134)   | 0.35                      | 0.27     | 0.47) |
| NORTH DAKOTA         | 1.96                                  | 1.46     | 3.08) | 746                         | (555     | 1,172)   | 2.77*                     | 1.80     | 4.51) |
| OHIO                 | 0.65                                  | 0.53     | 0.84) | 2,875                       | (2,352   | 3,729)   | 0.58                      | 0.45     | 0.78) |
| OKLAHOMA             | 1.84                                  | 1.51     | 2.38) | 9,718                       | (7,973   | 12,576)  | 0.50                      | 0.38     | 0.67) |

|                                  |       |       |       |         |          |          |       |       |       |
|----------------------------------|-------|-------|-------|---------|----------|----------|-------|-------|-------|
| OREGON                           | 1.54  | (1.26 | 1.97) | 6,878   | (5,623   | 8,824)   | 0.47  | (0.36 | 0.63) |
| PENNSYLVANIA                     | 1.29  | (1.06 | 1.67) | 9,649   | (7,910   | 12,499)  | 1.13  | (0.88 | 1.51) |
| RHODE ISLAND                     | 1.84  | (1.47 | 2.51) | 2,181   | (1,739   | 2,974)   | 0.95  | (0.70 | 1.36) |
| SOUTH CAROLINA                   | 0.58  | (0.46 | 0.79) | 1,272   | (1,011   | 1,728)   | 0.33  | (0.25 | 0.46) |
| SOUTH DAKOTA                     | 1.92  | (1.47 | 2.83) | 1,173   | (899     | 1,725)   | 2.25  | (1.53 | 3.47) |
| TENNESSEE                        | 0.57  | (0.45 | 0.78) | 1,620   | (1,273   | 2,228)   | 0.22  | (0.17 | 0.31) |
| TEXAS                            | 1.34  | (1.11 | 1.72) | 88,394  | (72,846  | 113,305) | 0.57  | (0.45 | 0.76) |
| UTAH                             | 0.92  | (0.74 | 1.24) | 2,614   | (2,108   | 3,514)   | 0.98  | (0.74 | 1.38) |
| VERMONT                          | 1.02  | (0.72 | 1.72) | 192     | (135     | 323)     | 0.70* | (0.45 | 1.20) |
| VIRGINIA                         | 0.39  | (0.32 | 0.51) | 3,127   | (2,543   | 4,081)   | 0.39  | (0.30 | 0.53) |
| WASHINGTON                       | 1.34  | (1.11 | 1.73) | 13,083  | (10,815  | 16,870)  | 0.55  | (0.43 | 0.74) |
| WEST VIRGINIA                    | 0.28* | (0.18 | 0.53) | 108*    | (70      | 207)     | 0.17* | (0.11 | 0.34) |
| WISCONSIN                        | 0.66  | (0.53 | 0.88) | 2,179   | (1,747   | 2,911)   | 1.11  | (0.84 | 1.53) |
| WYOMING                          | 2.08  | (1.58 | 3.06) | 936     | (710     | 1,382)   | 1.15  | (0.79 | 1.78) |
| U.S. STATES &<br>WASHINGTON D.C. | 1.19  | (0.99 | 1.53) | 557,222 | (463,335 | 714,245) | 0.73  | (0.57 | 0.97) |

Abbreviations: CI, confidence interval; anti-HCV, hepatitis C virus antibody

\*Coefficient of variation is  $\geq 23\%$ ; estimate is unreliable.

## References

1. United States Census Bureau. American Community Survey (ACS) 2017 [Available from: <https://www.census.gov/programs-surveys/acs/>].
2. Ruggles S, Genadek K, Goeken R, Grover J, Sobek M. Integrated Public Use Microdata Series: Version 6.0. Minneapolis: University of Minnesota; 2015.
